# Supplementary material for: Interfacial synthesis of a three-dimensional hierarchical MoS2-NS@Ag-NP nanocomposite as a SERS nanosensor for ultrasensitive thiram detection
Source: Royal Society of Chemistry journal article supplement (doi:10.1039/c7nr01891f), 2017-01-01
Supplement: c7nr01891f1.pdf [file c7nr01891f1.pdf]

## Electronic Supplementary Material

### Interfacial synthesis of three-dimensional hierarchical MoS<sub>2</sub>-NS@Ag-NPs nanocomposites as SERS nanosensor for ultrasensitive thiram detection

Xiu Liang,<sup>a</sup> Yi-Shuo Wang,<sup>a</sup> Ting-Ting You,<sup>b</sup> Xiao-Juan Zhang,<sup>a</sup> Nan Yang,<sup>a</sup> Guang-Sheng Wang<sup>\*,a</sup> and Peng-Gang Yin<sup>\*,a</sup>

<sup>a</sup> Key Laboratory of Bio-inspired Smart Interfacial Science and Technology of Ministry of Education, School of Chemistry and Environment, Beihang University, Beijing 100191, China

<sup>b</sup> School of Physics and Nuclear Energy Engineering, Beihang University, Beijing 100191, China

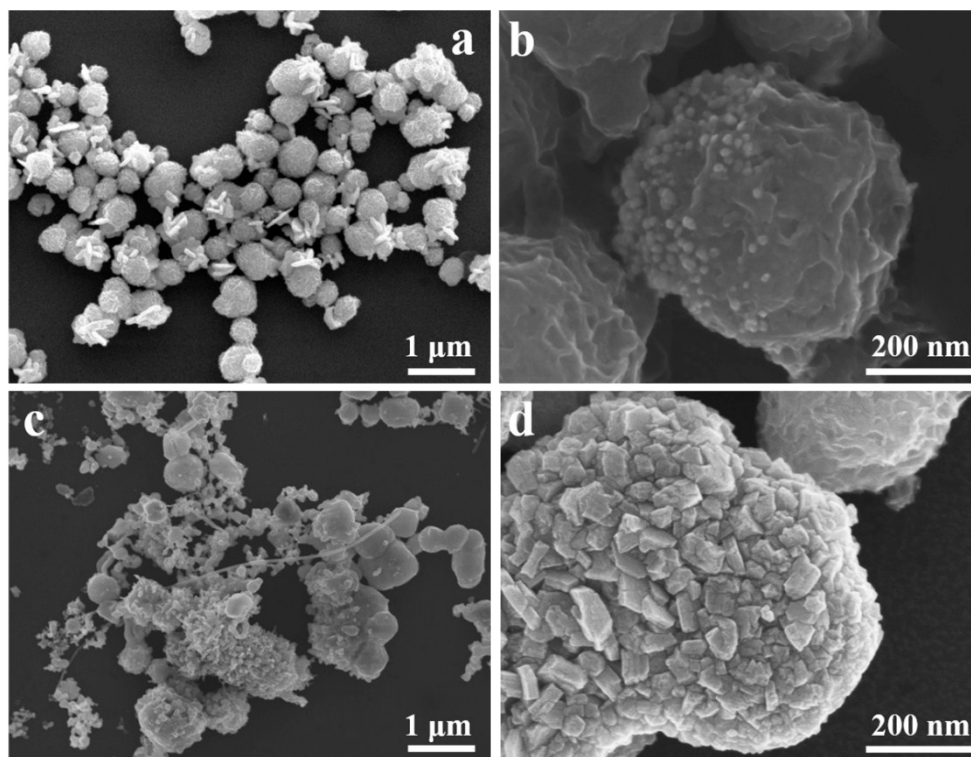

**Fig. S1** SEM images of MoS<sub>2</sub>-NS@ Au-seeds (a)(b) and MoS<sub>2</sub>-NS@Ag-NPs(c)(d) in a low (a)(c) and high (b) (d) magnification prepared from homogeneous phase method.

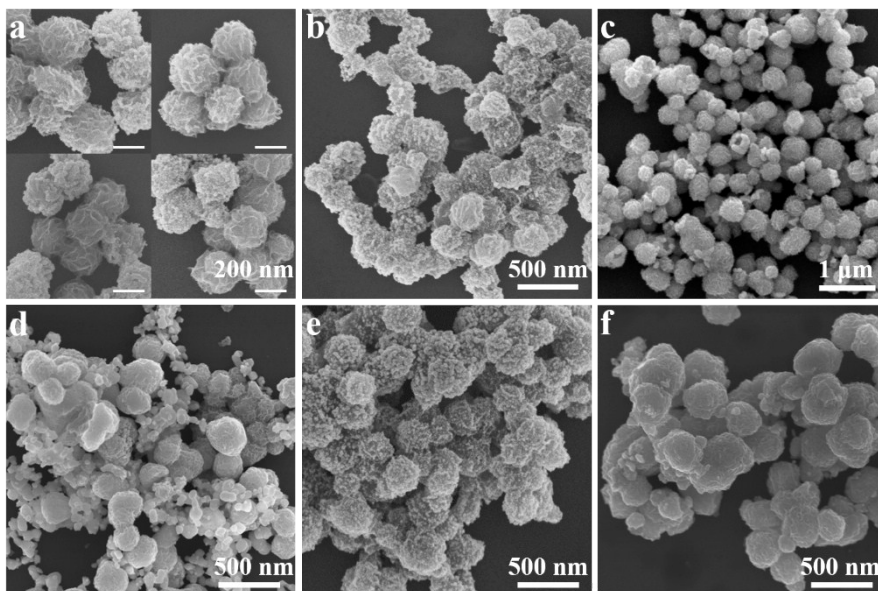

**Fig S2.** (a-c) SEM images of MoS<sub>2</sub>-NS@ Au-seeds with different  $V_{oil}/V_{water}$  ratio of (a)100:1 (b) 33:1 and (c) 1:1; (d-f) SEM images of MoS<sub>2</sub>-NS@ Au-seeds with different MoS<sub>2</sub>-NSs concentration in water phase: (d) 3.3 mg/mL (e) 16.4 mg/mL and (f) 163.9 mg/mL.

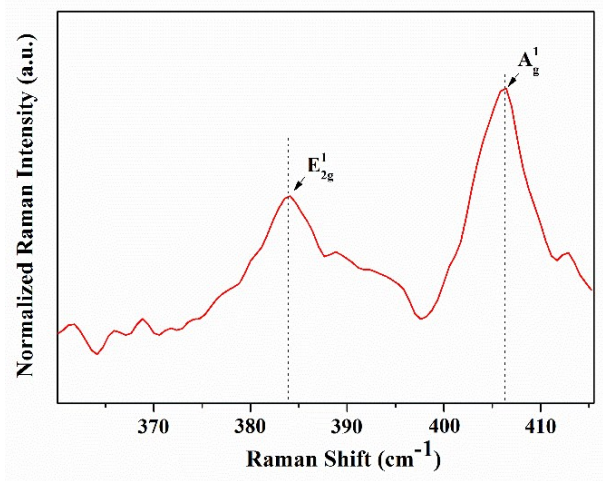

Fig S3. Raman spectrum of prepared 3D MoS<sub>2</sub>-NSs.

**Table S1.** Detailed experimental conditions in tuning the factors of  $V_{oil}:V_{water}$  and  $C_{MoS_2}$  (mg/mL) in the first synthesis of MoS<sub>2</sub>-NS @Au-seeds process.

| Factors                |           | $V_{oil}:V_{water}$              |                    |      | $C_{MoS_2}$ (mg/mL) |                |      |      |      |
|------------------------|-----------|----------------------------------|--------------------|------|---------------------|----------------|------|------|------|
|                        |           | Ratio                            | 100:1              | 33:1 | 1: 1                | C              | 3.3  | 16.4 | 63.9 |
| Experimental condition | Variables | $V_{oil}/mL$                     | 61                 | 20   | 20                  | $m_{MoS_2}/mg$ | 2.0  | 10.0 | 00.0 |
|                        |           | $V_{water}/mL$                   | 0.61               | 0.61 | 20                  | $V_{water}/mL$ | 0.61 | 0.61 | 0.61 |
|                        | Constants | H <sub>2</sub> AuCl <sub>4</sub> | 10 $\mu$ L, 0.25 M |      |                     |                |      |      |      |
|                        |           | NaBH <sub>4</sub>                | 0.6 mL, 0.1 M      |      |                     |                |      |      |      |

**Table S2.** The comparison of the previous thiram SERS sensors and our work.

| <b>SERS substrate</b>                                  | <b>EFs</b>         | <b>Laser (nm)</b> | <b>Real sample (thiram)</b>                          | <b>linear range</b>         | <b>LOD</b>              | <b>ref</b> |
|--------------------------------------------------------|--------------------|-------------------|------------------------------------------------------|-----------------------------|-------------------------|------------|
| AuNPs-based SERS tape                                  | $1.3 \times 10^5$  | 633               | spiked standard solution, no real sample             | N/A                         | 0.24 ng/cm <sup>2</sup> | [1]        |
| Centimeter-scale Au nanoisland films (NIFs)            | $10^7$ - $10^8$    | 785               | thiram fungicide in apple peels                      | 5-250 ppb                   | 5 ng/cm <sup>2</sup>    | [2]        |
| Ag@MSiO <sub>2</sub> film                              | N/A                | 785               | spiked standard solution, no real sample             | $10^{-8}$ M- $10^{-2}$ M    | $10^{-8}$ M             | [3]        |
| Au@Ag NPs                                              | N/A                | 785               | fruit peels                                          | N/A                         | 1.46 ng/cm <sup>2</sup> | [4]        |
| 3D Fe <sub>3</sub> O <sub>4</sub> @Ag-PEI-Au@Ag (CSSM) | $2.03 \times 10^8$ | 785               | spiked standard solution, no real sample             | N/A                         | $5 \times 10^{-12}$ M   | [5]        |
| 3D MoS <sub>2</sub> -NS@Ag-NPs                         | $1.2 \times 10^8$  | 514               | spiked standard solution, apple juice and lake water | 10 ppb-1 ppm (42 nM-4.2 μM) | 10 ppb (42 nM)          | this work  |

N/A: Not Applicable.

## Reference

1. Chen, J. M.; Huang, Y. J.; Kannan, P.; Zhang, L.; Lin, Z. Y.; Zhang, J. W.; Chen, T.; Guo, L. H. Flexible and Adhesive Surface Enhance Raman Scattering Active Tape for Rapid Detection of Pesticide Residues in Fruits and Vegetables. *Anal Chem* 2016, 88, 2149-2155.
2. Khlebtsov, B. N.; Khanadeev, V. A.; Panfilova, E. V.; Bratashov, D. N.; Khlebtsov, N. G. Gold Nanoisland Films as Reproducible SERS Substrates for Highly Sensitive Detection of Fungicides. *Acs Applied Materials & Interfaces* 2015, 7, 6518-6529.
3. Long, Y. J.; Wang, X. L.; Chen, D.; Jiang, T.; Zhao, Z. Q.; Zhou, J. Intense and stable surface-enhanced Raman scattering from Ag@mesoporous SiO<sub>2</sub> film. *J Lumin* 2016, 177, 387-393.
4. Liu, B. H.; Han, G. M.; Zhang, Z. P.; Liu, R. Y.; Jiang, C. L.; Wang, S. H.; Han, M. Y. Shell Thickness-Dependent Raman Enhancement for Rapid Identification and Detection of Pesticide Residues at Fruit Peels. *Anal Chem* 2012, 84, 255-261.
5. Wang, C. W.; Li, P.; Wang, J. F.; Rong, Z.; Pang, Y. F.; Xu, J. W.; Dong, P. T.; Xiao, R.; Wang, S. Q. Polyethylenimine- interlayered core-shell-satellite 3D magnetic microspheres as versatile SERS substrates. *Nanoscale* 2015, 7, 18694-18707.
